# Supplementary material for: Strain- and chirality-engineered tunability of electronic and thermoelectric properties in SiC nanotubes: insights from first-principles calculations
Source: Royal Society of Chemistry journal article supplement (doi:10.1039/d6ra00892e), 2026-04-14
Supplement: d6ra00892e1.pdf [file d6ra00892e1.pdf]

## Supplementary Information

### **Strain- and chirality-engineered tunability of electronic and thermoelectric properties in SiC nanotubes: insights from first-principles calculations**

Imam Hussain<sup>a</sup>, A. S. M. Jannatul Islam<sup>a,\*</sup>, Tamanna Tanvin Tanha<sup>a</sup>, and Md. Mafizul Islam<sup>b</sup>

<sup>a</sup>Department of Electrical and Electronic Engineering, Khulna University of Engineering & Technology, Khulna 9203, Bangladesh.

<sup>b</sup>Department of Textile Machinery Design and Maintenance, Bangladesh University of Textiles, Dhaka 1208, Bangladesh

\*Corresponding author. E-mail: [jannatul@eee.kuet.ac.bd](mailto:jannatul@eee.kuet.ac.bd)

## Optimized crystal structure of (10,0) SiCNT (CIF format)

```
#=====
# CRYSTAL DATA
#-----
data_VESTA_phase_1

_chemical_name_common      'nanotube'
_cell_length_a             13.246300
_cell_length_b             13.246300
_cell_length_c             5.375500
_cell_angle_alpha         90.000000
_cell_angle_beta          90.000000
_cell_angle_gamma         120.000000
_cell_volume               816.843149
_space_group_name_H-M_alt  'P 1'
_space_group_IT_number     1

loop_
_space_group_symop_operation_xyz
  'x, y, z'

loop_
_atom_site_label
_atom_site_occupancy
_atom_site_fract_x
_atom_site_fract_y
_atom_site_fract_z
_atom_site_adp_type
_atom_site_U_iso_or_equiv
_atom_site_type_symbol
```

|    |     |          |          |          |           |
|----|-----|----------|----------|----------|-----------|
| C  | 1.0 | 0.873700 | 0.500000 | 0.333000 | Uiso ? C  |
| Si | 1.0 | 0.873700 | 0.500000 | 0.000000 | Uiso ? Si |
| C  | 1.0 | 0.922000 | 0.633300 | 0.833000 | Uiso ? C  |
| Si | 1.0 | 0.922000 | 0.633300 | 0.500000 | Uiso ? Si |
| C  | 1.0 | 0.929100 | 0.753600 | 0.333000 | Uiso ? C  |
| Si | 1.0 | 0.929100 | 0.753600 | 0.000000 | Uiso ? Si |
| C  | 1.0 | 0.894200 | 0.849100 | 0.833000 | Uiso ? C  |
| Si | 1.0 | 0.894200 | 0.849100 | 0.500000 | Uiso ? Si |
| C  | 1.0 | 0.820600 | 0.910400 | 0.333000 | Uiso ? C  |
| Si | 1.0 | 0.820600 | 0.910400 | 0.000000 | Uiso ? Si |
| C  | 1.0 | 0.715700 | 0.931500 | 0.833000 | Uiso ? C  |
| Si | 1.0 | 0.715700 | 0.931500 | 0.500000 | Uiso ? Si |
| C  | 1.0 | 0.589700 | 0.910400 | 0.333000 | Uiso ? C  |
| Si | 1.0 | 0.589700 | 0.910400 | 0.000000 | Uiso ? Si |
| C  | 1.0 | 0.454900 | 0.849100 | 0.833000 | Uiso ? C  |
| Si | 1.0 | 0.454900 | 0.849100 | 0.500000 | Uiso ? Si |
| C  | 1.0 | 0.324500 | 0.753600 | 0.333000 | Uiso ? C  |
| Si | 1.0 | 0.324500 | 0.753600 | 0.000000 | Uiso ? Si |
| C  | 1.0 | 0.211300 | 0.633300 | 0.833000 | Uiso ? C  |
| Si | 1.0 | 0.211300 | 0.633300 | 0.500000 | Uiso ? Si |
| C  | 1.0 | 0.126300 | 0.500000 | 0.333000 | Uiso ? C  |
| Si | 1.0 | 0.126300 | 0.500000 | 0.000000 | Uiso ? Si |
| C  | 1.0 | 0.078000 | 0.366700 | 0.833000 | Uiso ? C  |
| Si | 1.0 | 0.078000 | 0.366700 | 0.500000 | Uiso ? Si |
| C  | 1.0 | 0.070900 | 0.246400 | 0.333000 | Uiso ? C  |
| Si | 1.0 | 0.070900 | 0.246400 | 0.000000 | Uiso ? Si |
| C  | 1.0 | 0.105800 | 0.150900 | 0.833000 | Uiso ? C  |
| Si | 1.0 | 0.105800 | 0.150900 | 0.500000 | Uiso ? Si |
| C  | 1.0 | 0.179400 | 0.089600 | 0.333000 | Uiso ? C  |
| Si | 1.0 | 0.179400 | 0.089600 | 0.000000 | Uiso ? Si |
| C  | 1.0 | 0.284300 | 0.068500 | 0.833000 | Uiso ? C  |

|    |     |          |          |          |           |
|----|-----|----------|----------|----------|-----------|
| Si | 1.0 | 0.284300 | 0.068500 | 0.500000 | Uiso ? Si |
| C  | 1.0 | 0.410300 | 0.089600 | 0.333000 | Uiso ? C  |
| Si | 1.0 | 0.410300 | 0.089600 | 0.000000 | Uiso ? Si |
| C  | 1.0 | 0.545100 | 0.150900 | 0.833000 | Uiso ? C  |
| Si | 1.0 | 0.545100 | 0.150900 | 0.500000 | Uiso ? Si |
| C  | 1.0 | 0.675500 | 0.246400 | 0.333000 | Uiso ? C  |
| Si | 1.0 | 0.675500 | 0.246400 | 0.000000 | Uiso ? Si |
| C  | 1.0 | 0.788700 | 0.366700 | 0.833000 | Uiso ? C  |
| Si | 1.0 | 0.788700 | 0.366700 | 0.500000 | Uiso ? Si |

### Optimized crystal structure of (11,0) SiCNT (CIF format)

=====

# CRYSTAL DATA

#-----

data\_VESTA\_phase\_1

\_chemical\_name\_common 'nanotube'

\_cell\_length\_a 14.230400

\_cell\_length\_b 14.230400

\_cell\_length\_c 5.374600

\_cell\_angle\_alpha 90.000000

\_cell\_angle\_beta 90.000000

\_cell\_angle\_gamma 120.000000

\_cell\_volume 942.564318

\_space\_group\_name\_H-M\_alt 'P 1'

\_space\_group\_IT\_number 1

loop\_

\_space\_group\_symop\_operation\_xyz

'x, y, z'

loop\_

\_atom\_site\_label

\_atom\_site\_occupancy

\_atom\_site\_fract\_x

\_atom\_site\_fract\_y

\_atom\_site\_fract\_z

\_atom\_site\_adp\_type

\_atom\_site\_U\_iso\_or\_equiv

\_atom\_site\_type\_symbol

|    |     |          |          |          |           |
|----|-----|----------|----------|----------|-----------|
| C  | 1.0 | 0.882400 | 0.500000 | 0.333100 | Uiso ? C  |
| Si | 1.0 | 0.882400 | 0.500000 | 0.000000 | Uiso ? Si |
| C  | 1.0 | 0.929100 | 0.624400 | 0.833100 | Uiso ? C  |
| Si | 1.0 | 0.929100 | 0.624400 | 0.500000 | Uiso ? Si |
| C  | 1.0 | 0.941100 | 0.738700 | 0.333100 | Uiso ? C  |
| Si | 1.0 | 0.941100 | 0.738700 | 0.000000 | Uiso ? Si |
| C  | 1.0 | 0.917300 | 0.833700 | 0.833100 | Uiso ? C  |
| Si | 1.0 | 0.917300 | 0.833700 | 0.500000 | Uiso ? Si |
| C  | 1.0 | 0.859700 | 0.901700 | 0.333100 | Uiso ? C  |
| Si | 1.0 | 0.859700 | 0.901700 | 0.000000 | Uiso ? Si |
| C  | 1.0 | 0.773000 | 0.937100 | 0.833100 | Uiso ? C  |
| Si | 1.0 | 0.773000 | 0.937100 | 0.500000 | Uiso ? Si |
| C  | 1.0 | 0.664100 | 0.937100 | 0.333100 | Uiso ? C  |
| Si | 1.0 | 0.664100 | 0.937100 | 0.000000 | Uiso ? Si |
| C  | 1.0 | 0.542000 | 0.901700 | 0.833100 | Uiso ? C  |
| Si | 1.0 | 0.542000 | 0.901700 | 0.500000 | Uiso ? Si |
| C  | 1.0 | 0.416400 | 0.833700 | 0.333100 | Uiso ? C  |
| Si | 1.0 | 0.416400 | 0.833700 | 0.000000 | Uiso ? Si |
| C  | 1.0 | 0.297700 | 0.738700 | 0.833100 | Uiso ? C  |

|    |     |          |          |          |           |
|----|-----|----------|----------|----------|-----------|
| Si | 1.0 | 0.297700 | 0.738700 | 0.500000 | Uiso ? Si |
| C  | 1.0 | 0.195300 | 0.624400 | 0.333100 | Uiso ? C  |
| Si | 1.0 | 0.195300 | 0.624400 | 0.000000 | Uiso ? Si |
| C  | 1.0 | 0.117600 | 0.500000 | 0.833100 | Uiso ? C  |
| Si | 1.0 | 0.117600 | 0.500000 | 0.500000 | Uiso ? Si |
| C  | 1.0 | 0.070900 | 0.375600 | 0.333100 | Uiso ? C  |
| Si | 1.0 | 0.070900 | 0.375600 | 0.000000 | Uiso ? Si |
| C  | 1.0 | 0.058900 | 0.261300 | 0.833100 | Uiso ? C  |
| Si | 1.0 | 0.058900 | 0.261300 | 0.500000 | Uiso ? Si |
| C  | 1.0 | 0.082700 | 0.166300 | 0.333100 | Uiso ? C  |
| Si | 1.0 | 0.082700 | 0.166300 | 0.000000 | Uiso ? Si |
| C  | 1.0 | 0.140300 | 0.098300 | 0.833100 | Uiso ? C  |
| Si | 1.0 | 0.140300 | 0.098300 | 0.500000 | Uiso ? Si |
| C  | 1.0 | 0.227000 | 0.062900 | 0.333100 | Uiso ? C  |
| Si | 1.0 | 0.227000 | 0.062900 | 0.000000 | Uiso ? Si |
| C  | 1.0 | 0.335900 | 0.062900 | 0.833100 | Uiso ? C  |
| Si | 1.0 | 0.335900 | 0.062900 | 0.500000 | Uiso ? Si |
| C  | 1.0 | 0.458000 | 0.098300 | 0.333100 | Uiso ? C  |
| Si | 1.0 | 0.458000 | 0.098300 | 0.000000 | Uiso ? Si |
| C  | 1.0 | 0.583600 | 0.166300 | 0.833100 | Uiso ? C  |
| Si | 1.0 | 0.583600 | 0.166300 | 0.500000 | Uiso ? Si |
| C  | 1.0 | 0.702300 | 0.261300 | 0.333100 | Uiso ? C  |
| Si | 1.0 | 0.702300 | 0.261300 | 0.000000 | Uiso ? Si |
| C  | 1.0 | 0.804700 | 0.375600 | 0.833100 | Uiso ? C  |
| Si | 1.0 | 0.804700 | 0.375600 | 0.500000 | Uiso ? Si |

## Optimized crystal structure of (6,0) SiCNT (CIF format)

```
#=====
# CRYSTAL DATA
#-----
data_VESTA_phase_1

_chemical_name_common      'nanotube'
_cell_length_a             9.319200
_cell_length_b             9.319200
_cell_length_c             5.385400
_cell_angle_alpha          90.000000
_cell_angle_beta           90.000000
_cell_angle_gamma          120.000000
_cell_volume                405.047361
_space_group_name_H-M_alt   'P 1'
_space_group_IT_number      1

loop_
_space_group_symop_operation_xyz
  'x, y, z'

loop_
  _atom_site_label
  _atom_site_occupancy
  _atom_site_fract_x
  _atom_site_fract_y
  _atom_site_fract_z
  _atom_site_adp_type
  _atom_site_U_iso_or_equiv
  _atom_site_type_symbol
```

|    |     |          |          |          |           |
|----|-----|----------|----------|----------|-----------|
| C  | 1.0 | 0.820400 | 0.500000 | 0.332400 | Uiso ? C  |
| Si | 1.0 | 0.820400 | 0.500000 | 0.000000 | Uiso ? Si |
| C  | 1.0 | 0.870000 | 0.685000 | 0.832400 | Uiso ? C  |
| Si | 1.0 | 0.870000 | 0.685000 | 0.500000 | Uiso ? Si |
| C  | 1.0 | 0.820400 | 0.820400 | 0.332400 | Uiso ? C  |
| Si | 1.0 | 0.820400 | 0.820400 | 0.000000 | Uiso ? Si |
| C  | 1.0 | 0.685000 | 0.870000 | 0.832400 | Uiso ? C  |
| Si | 1.0 | 0.685000 | 0.870000 | 0.500000 | Uiso ? Si |
| C  | 1.0 | 0.500000 | 0.820400 | 0.332400 | Uiso ? C  |
| Si | 1.0 | 0.500000 | 0.820400 | 0.000000 | Uiso ? Si |
| C  | 1.0 | 0.315000 | 0.685000 | 0.832400 | Uiso ? C  |
| Si | 1.0 | 0.315000 | 0.685000 | 0.500000 | Uiso ? Si |
| C  | 1.0 | 0.179600 | 0.500000 | 0.332400 | Uiso ? C  |
| Si | 1.0 | 0.179600 | 0.500000 | 0.000000 | Uiso ? Si |
| C  | 1.0 | 0.130000 | 0.315000 | 0.832400 | Uiso ? C  |
| Si | 1.0 | 0.130000 | 0.315000 | 0.500000 | Uiso ? Si |
| C  | 1.0 | 0.179600 | 0.179600 | 0.332400 | Uiso ? C  |
| Si | 1.0 | 0.179600 | 0.179600 | 0.000000 | Uiso ? Si |
| C  | 1.0 | 0.315000 | 0.130000 | 0.832400 | Uiso ? C  |
| Si | 1.0 | 0.315000 | 0.130000 | 0.500000 | Uiso ? Si |
| C  | 1.0 | 0.500000 | 0.179600 | 0.332400 | Uiso ? C  |
| Si | 1.0 | 0.500000 | 0.179600 | 0.000000 | Uiso ? Si |
| C  | 1.0 | 0.685000 | 0.315000 | 0.832400 | Uiso ? C  |
| Si | 1.0 | 0.685000 | 0.315000 | 0.500000 | Uiso ? Si |

### Optimized crystal structure of (6,6) SiCNT (CIF format)

```

=====
# CRYSTAL DATA
#-----
data_VESTA_phase_1

```

\_chemical\_name\_common 'nanotube'  
 \_cell\_length\_a 13.639000  
 \_cell\_length\_b 13.639000  
 \_cell\_length\_c 3.101300  
 \_cell\_angle\_alpha 90.000000  
 \_cell\_angle\_beta 90.000000  
 \_cell\_angle\_gamma 120.000000  
 \_cell\_volume 499.619598  
 \_space\_group\_name\_H-M\_alt 'P 1'  
 \_space\_group\_IT\_number 1

loop\_

\_space\_group\_symop\_operation\_xyz  
 'x, y, z'

loop\_

\_atom\_site\_label  
 \_atom\_site\_occupancy  
 \_atom\_site\_fract\_x  
 \_atom\_site\_fract\_y  
 \_atom\_site\_fract\_z  
 \_atom\_site\_adp\_type  
 \_atom\_site\_U\_iso\_or\_equiv  
 \_atom\_site\_type\_symbol  
 Si 1.0 0.877300 0.500000 0.000000 Uiso ? Si  
 C 1.0 0.929100 0.649200 0.000000 Uiso ? C  
 Si 1.0 0.935700 0.717800 0.500000 Uiso ? Si  
 C 1.0 0.909300 0.833900 0.500000 Uiso ? C  
 Si 1.0 0.877300 0.877300 0.000000 Uiso ? Si  
 C 1.0 0.779900 0.929100 0.000000 Uiso ? C

|    |     |          |          |          |           |
|----|-----|----------|----------|----------|-----------|
| Si | 1.0 | 0.717800 | 0.935700 | 0.500000 | Uiso ? Si |
| C  | 1.0 | 0.575400 | 0.909300 | 0.500000 | Uiso ? C  |
| Si | 1.0 | 0.500000 | 0.877300 | 0.000000 | Uiso ? Si |
| C  | 1.0 | 0.350800 | 0.779900 | 0.000000 | Uiso ? C  |
| Si | 1.0 | 0.282200 | 0.717800 | 0.500000 | Uiso ? Si |
| C  | 1.0 | 0.166100 | 0.575400 | 0.500000 | Uiso ? C  |
| Si | 1.0 | 0.122700 | 0.500000 | 0.000000 | Uiso ? Si |
| C  | 1.0 | 0.070900 | 0.350800 | 0.000000 | Uiso ? C  |
| Si | 1.0 | 0.064300 | 0.282200 | 0.500000 | Uiso ? Si |
| C  | 1.0 | 0.090700 | 0.166100 | 0.500000 | Uiso ? C  |
| Si | 1.0 | 0.122700 | 0.122700 | 0.000000 | Uiso ? Si |
| C  | 1.0 | 0.220100 | 0.070900 | 0.000000 | Uiso ? C  |
| Si | 1.0 | 0.282200 | 0.064300 | 0.500000 | Uiso ? Si |
| C  | 1.0 | 0.424600 | 0.090700 | 0.500000 | Uiso ? C  |
| Si | 1.0 | 0.500000 | 0.122700 | 0.000000 | Uiso ? Si |
| C  | 1.0 | 0.649200 | 0.220100 | 0.000000 | Uiso ? C  |
| Si | 1.0 | 0.717800 | 0.282200 | 0.500000 | Uiso ? Si |
| C  | 1.0 | 0.833900 | 0.424600 | 0.500000 | Uiso ? C  |

Figure S1

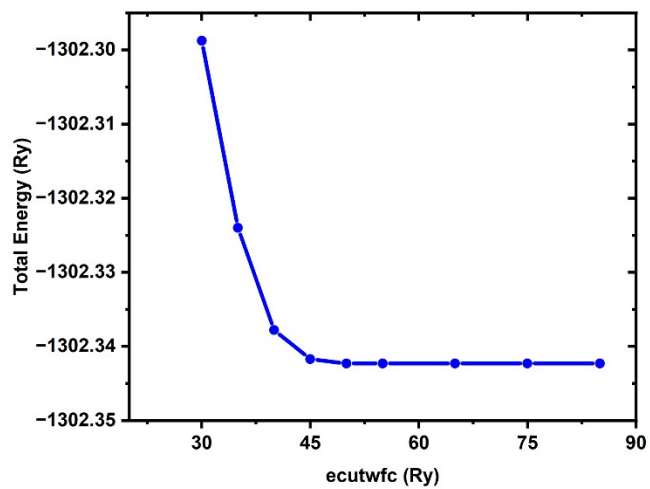

(a) Cutoff energy convergence for (10,0) SiCNT

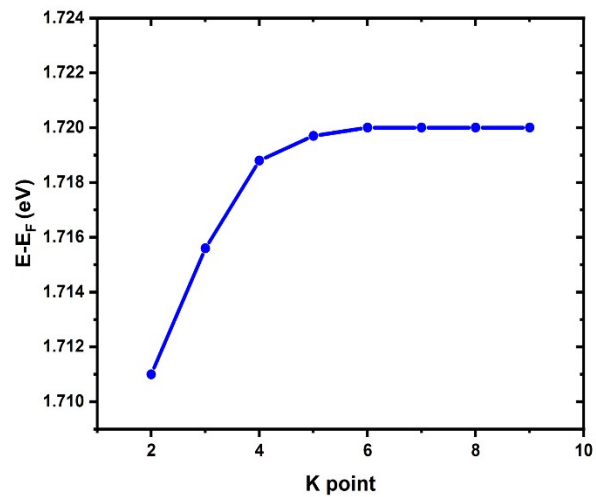

(b) k-point convergence of the bandgap for (10,0) SiCNT

**Fig. S1.** (a) Cutoff energy convergence for (10,0) SiCNT (b) k- point convergence of the bandgap for (10,0) SiCNT

Figure S2

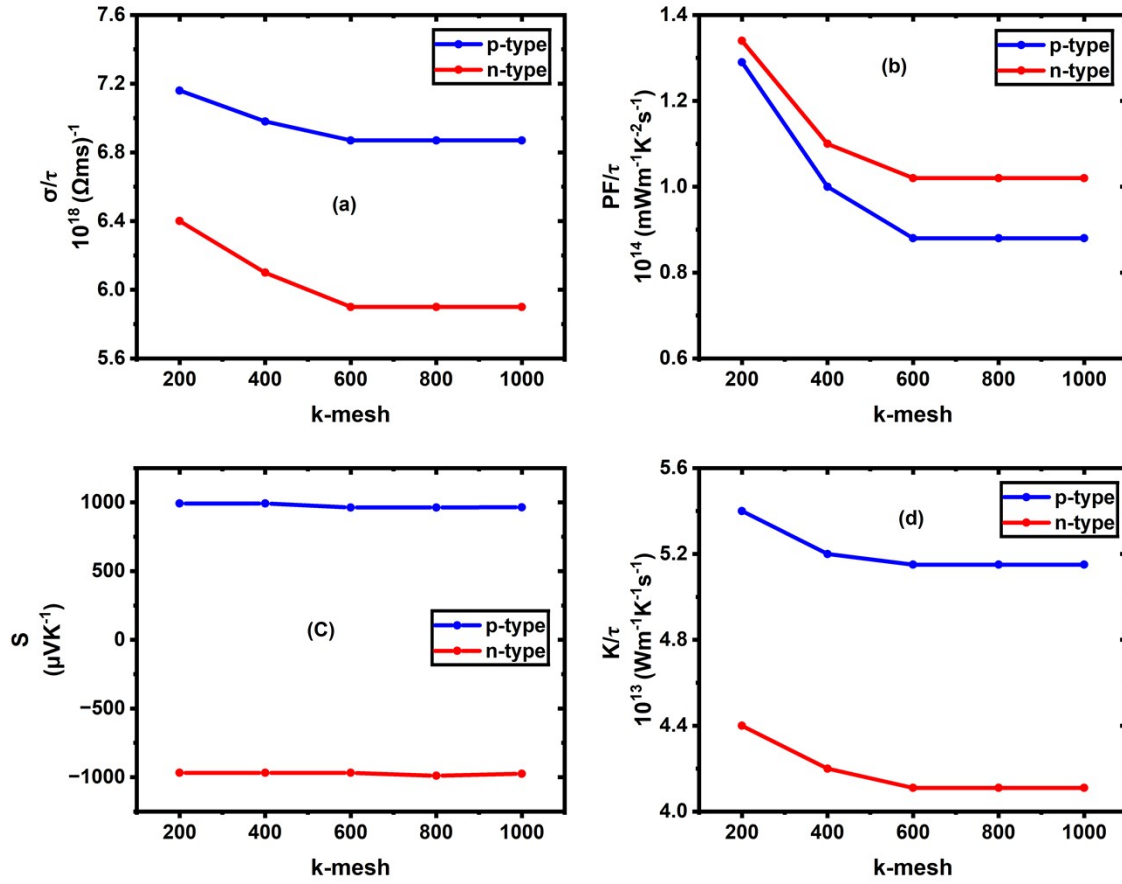

**Fig. S2.** k-mesh convergence of (a) electrical conductivity ( $\sigma/\tau$ ), (b) power factor ( $\text{PF}/\tau$ ), (c) Seebeck coefficient ( $S$ ), and (d) electronic thermal conductivity ( $\kappa/\tau$ ) for the (6,0) SiCNT.

Figure S3

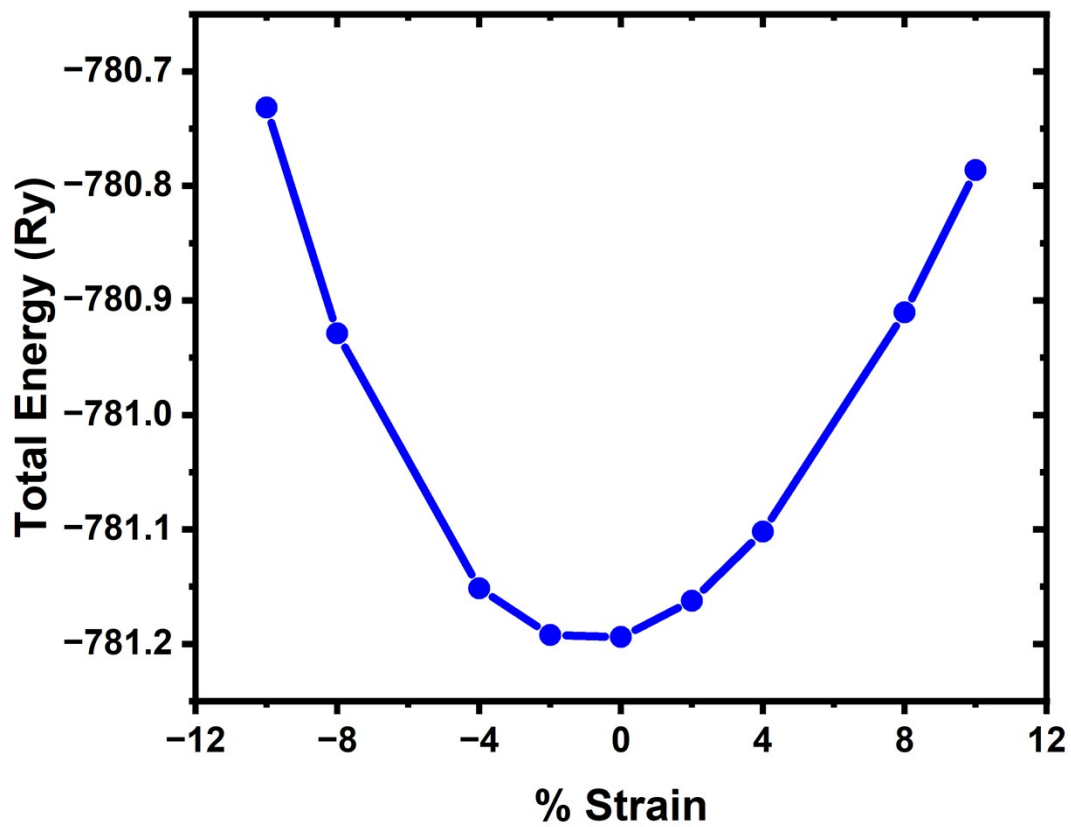

Fig. S3. Total energy as a function of applied uniaxial strain (-10% to +10%) for the (6,0) SiCNT

Figure S4

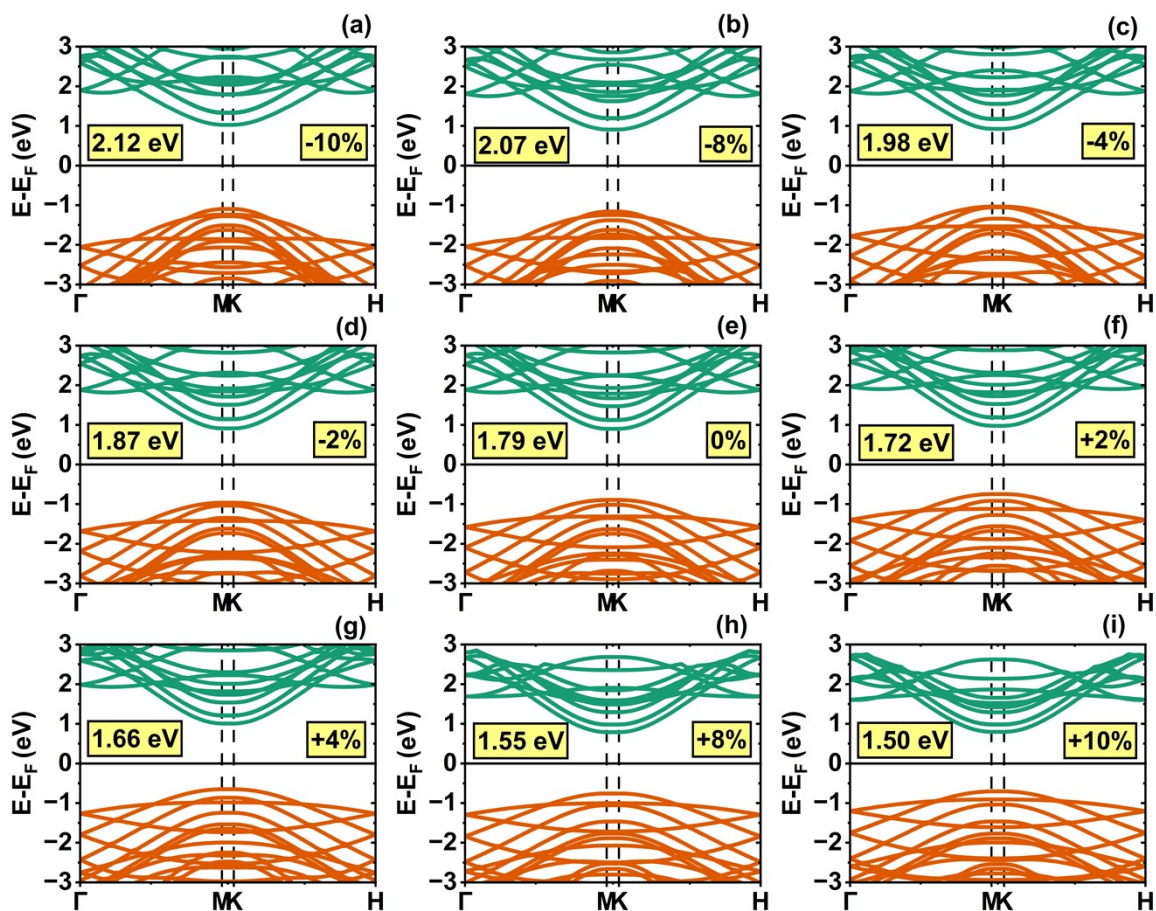

**Fig. S4.** Electronic band structures of the (11,0) single-walled SiCNT under uniaxial strain: (a)  $-10\%$ , (b)  $-8\%$ , (c)  $-4\%$ , (d)  $-2\%$ , (e)  $0\%$  (relaxed state), (f)  $+2\%$ , (g)  $+4\%$ , (h)  $+8\%$ , and (i)  $+10\%$ .

Figure S5

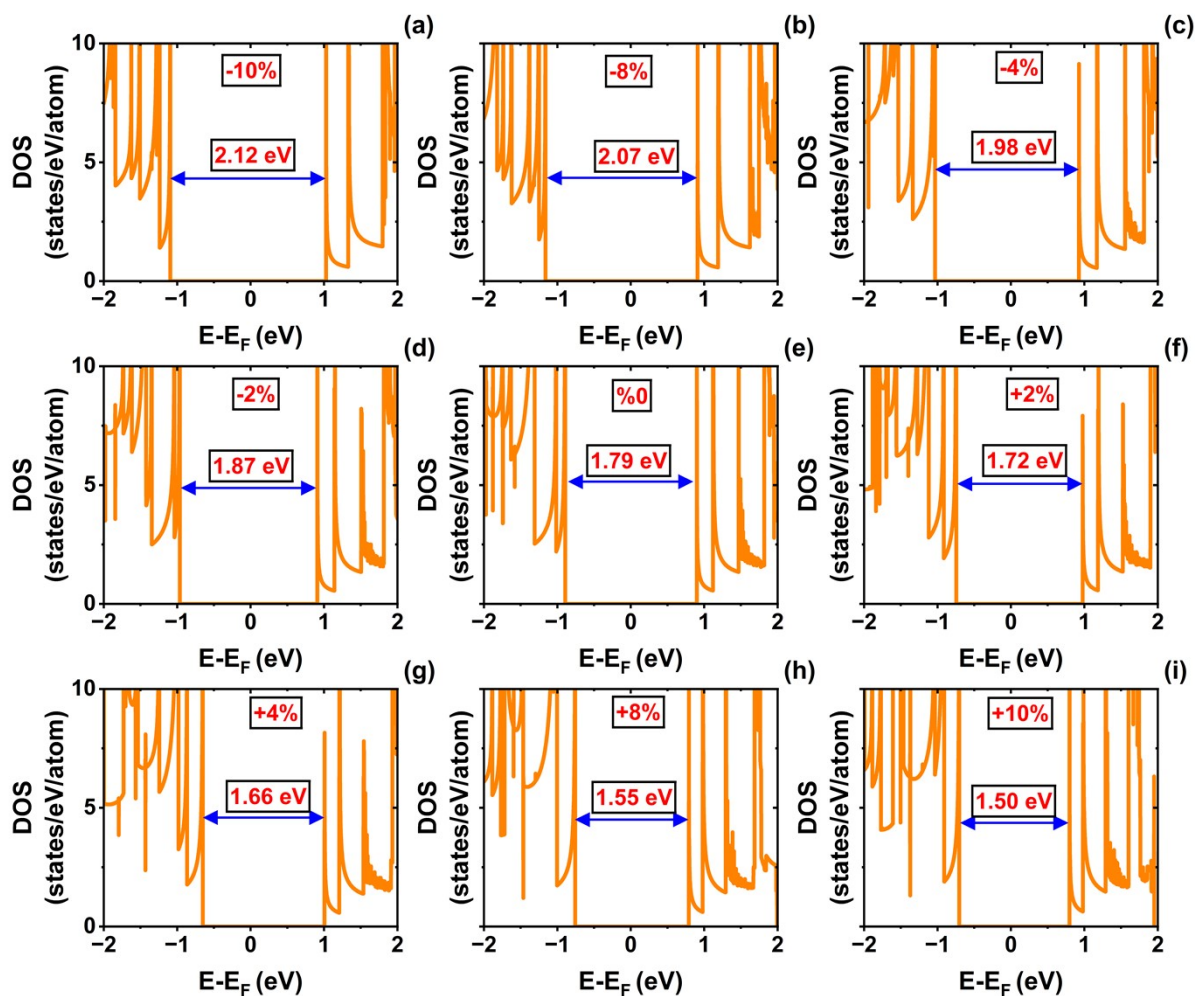

**Fig. S5.** Density of states (DOS) of the (11,0) single-walled SiCNT under uniaxial strain: (a) –10%, (b) –8%, (c) –4%, (d) –2%, (e) 0% (relaxed state), (f) +2%, (g) +4%, (h) +8%, and (i) +10%.

Figure S6

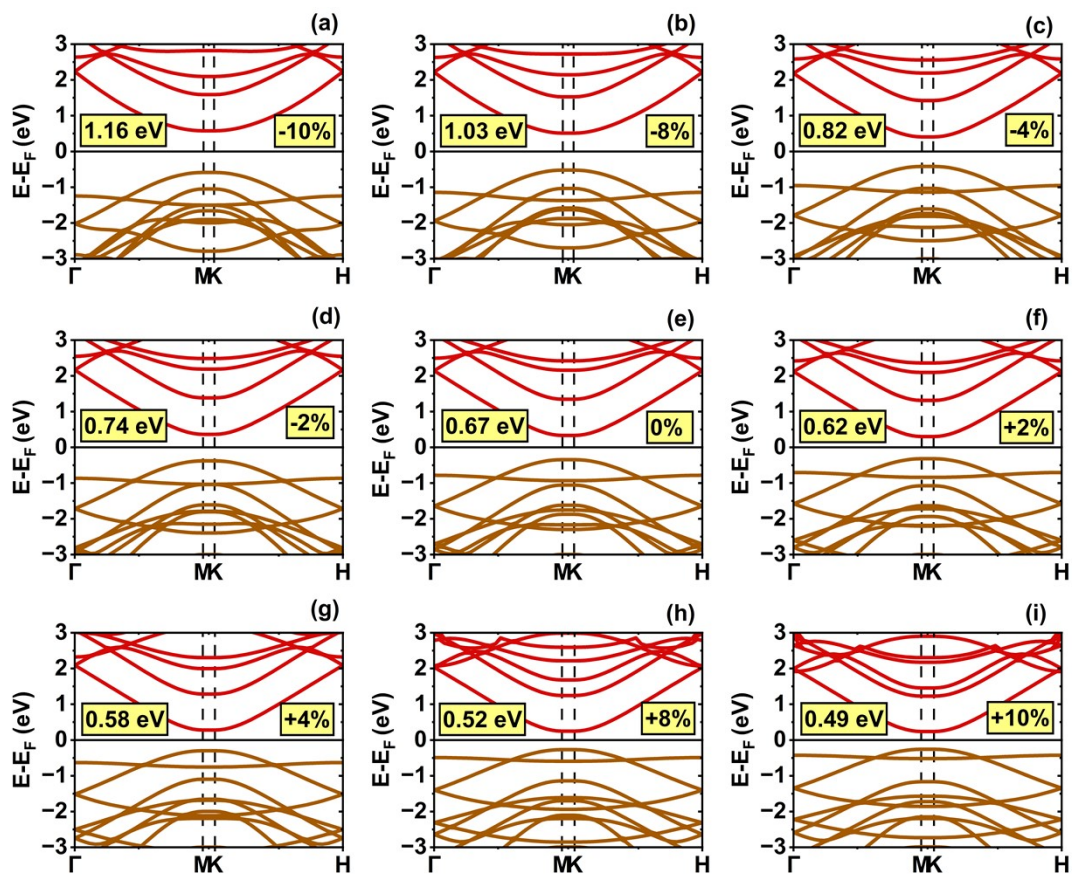

**Fig. S6.** Electronic band structures of the (6,0) single-walled SiCNT under uniaxial strain: (a)  $-10\%$ , (b)  $-8\%$ , (c)  $-4\%$ , (d)  $-2\%$ , (e)  $0\%$  (relaxed state), (f)  $+2\%$ , (g)  $+4\%$ , (h)  $+8\%$ , and (i)  $+10\%$ .

Figure S7

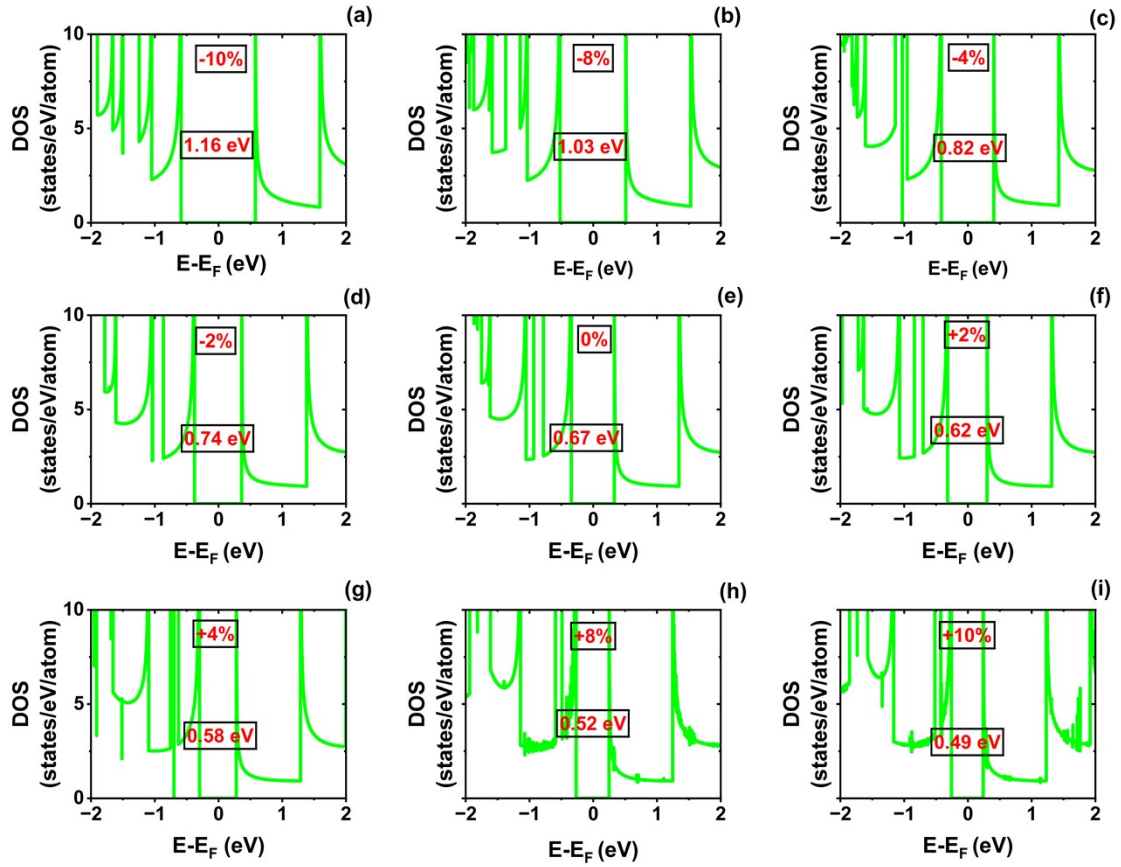

**Fig. S7.** Density of states (DOS) of the (6,0) single-walled SiCNT under uniaxial strain: (a) –10%, (b) –8%, (c) –4%, (d) –2%, (e) 0% (relaxed state), (f) +2%, (g) +4%, (h) +8%, and (i) +10%.

**Figure S8**

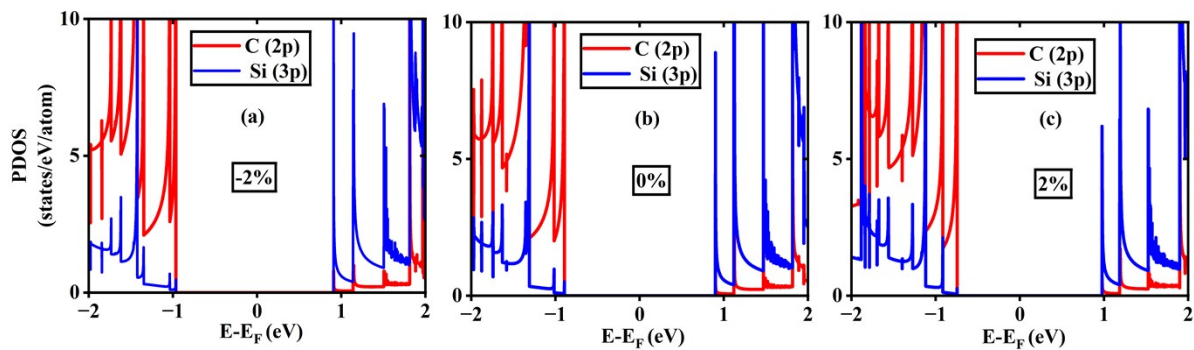

**Fig. S8.** Orbital-resolved PDOS of the (11,0) SiCNT under (a) -2%, (b) 0%, and (c) +2% strain, highlighting the contributions of C-2p and Si-3p states near the Fermi level.

**Table S1.** Comparison of bandgap values obtained using different exchange–correlation functionals and thermoelectric parameters of SiCNTs from literature and the present work

(A) Bandgap comparison using different theoretical methods for SWSiCNTs

| Nanotube | GGA (present work) | GGA (Literature)     | LDA                  | HSE06(estimated) <sup>1</sup> |
|----------|--------------------|----------------------|----------------------|-------------------------------|
| (6,0)    | 0.67 eV            | 0.68 eV <sup>2</sup> | 0.70 eV <sup>3</sup> | 1.70 eV                       |
| (10,0)   | 1.72 eV            | 1.76 eV <sup>2</sup> | 1.55 eV <sup>4</sup> | 2.55 eV                       |
| (11,0)   | 1.79 eV            | 1.87 eV <sup>2</sup> | ----                 | ----                          |
| (6,6)    | 2.16 eV            | 2.03 eV <sup>5</sup> | 1.78 eV <sup>6</sup> | 2.78 eV                       |

(B) Thermoelectric parameters from literature (SWCNTs)<sup>7</sup>

| Nanotube | Seebeck( $\mu\text{VK}^{-1}$ ) | $\sigma/\tau$ ( $\Omega^{-1} \text{m}^{-1} \text{s}^{-1}$ ) | PF/ $\tau$ ( $\text{mW m}^{-1} \text{K}^{-2} \text{s}^{-1}$ ) |
|----------|--------------------------------|-------------------------------------------------------------|---------------------------------------------------------------|
| (11,0)   | 1579 (-3%)                     | $9.75 \times 10^{18}$ (-3%)                                 | $1.55 \times 10^{14}$ (-9%)                                   |
| (10,0)   | 1580 (+3%)                     | $9.5 \times 10^{18}$ (-9%)                                  | $1.44 \times 10^{14}$ (-3%)                                   |
| (6,6)    | 155 (-6%)                      | $2.03 \times 10^{19}$ (-9%)                                 | $2.34 \times 10^{14}$ (-9%)                                   |

(C) Thermoelectric parameters from the present work (SWSiCNTs)

| Nanotube | Seebeck( $\mu\text{VK}^{-1}$ ) | $\sigma/\tau$ ( $\Omega^{-1} \text{m}^{-1} \text{s}^{-1}$ ) | PF/ $\tau$ ( $\text{mW m}^{-1} \text{K}^{-2} \text{s}^{-1}$ ) |
|----------|--------------------------------|-------------------------------------------------------------|---------------------------------------------------------------|
| (11,0)   | 1550.24 (-10% to +10%)         | $1.72 \times 10^{19}$ (-10%)                                | $2.07 \times 10^{14}$ (-10%)                                  |
| (10,0)   | 1550.9 (0%)                    | $1.46 \times 10^{19}$ (-10%)                                | $1.36 \times 10^{14}$ (-0% to -2%)                            |
| (6,6)    | 1550 (-10% to +10%)            | $2.29 \times 10^{19}$ (-10%)                                | $1.95 \times 10^{14}$ (+10%)                                  |

## References

- 1 H. C. Hsueh, G. Y. Guo and S. G. Louie, Excitonic effects in the optical properties of SiC sheet and nanotubes, DOI:10.48550/ARXIV.1105.5531.
- 2 H. Wang, W. Liu and J. Zhao, Theoretical study on the oxidation of zigzag silicon carbide nanotubes (SiCNTs) by singlet O<sub>2</sub>, *Phys. B Condens. Matter*, 2012, **407**, 4238–4243.
- 3 I. J. Wu and G. Y. Guo, Optical properties of SiC nanotubes: An *ab initio* study, *Phys. Rev. B*, 2007, **76**, 035343.
- 4 R. J. Baierle, P. Piquini, L. P. Neves and R. H. Miwa, *Ab initio* study of native defects in SiC nanotubes, *Phys. Rev. B*, 2006, **74**, 155425.
- 5 W. Shi, S. Wu and Z. Wang, Tuning the electronic properties of single-walled SiC nanotubes by external electric field, *Phys. E Low-Dimens. Syst. Nanostructures*, 2016, **81**, 192–195.
- 6 Y. Qin, C. Chai, Z. Si, Y. Song and Y. Yang, Six novel silicon carbide with direct bandgaps: A comprehensive study, *Chem. Phys.*, 2022, **561**, 111603.

7Md. M. Islam and A. Zubair, *Ab initio* study of uniaxial strain-induced thermoelectric property tuning of individual single-wall carbon nanotubes, *Mater. Adv.*, 2023, **4**, 6553–6567.
